# Supplementary material for: An RNA origami robot that traps and releases a fluorescent aptamer
Source: bioRxiv or medRxiv preprint supplement (doi:10.1101/2023.05.19.541473), 2023-05-22
Supplement: Supplementary file [file media-1.pdf]

# SUPPLEMENTARY INFORMATION

## An RNA origami robot that traps and releases a fluorescent aptamer

Néstor Sampedro Vallina<sup>1</sup>, Ewan K.S. McRae<sup>1</sup>, Cody Geary<sup>1</sup> and Ebbe Sloth Andersen<sup>1,2,\*</sup>

<sup>1</sup>Interdisciplinary Nanoscience Center (iNANO); Gustav Wieds Vej 14, Aarhus University, DK-8000 Aarhus, Denmark. <sup>2</sup>Department of Molecular Biology and Genetics, Aarhus University, Aarhus, Denmark.

\*Corresponding author. Email: [esa@inano.au.dk](mailto:esa@inano.au.dk)

### Content:

|                                                                                              |    |
|----------------------------------------------------------------------------------------------|----|
| Figure S1. Design screening for a co-transcriptionally folded RNA mechanical trap.....       | 2  |
| Figure S2. Opening of Trap-14-14 and stabilities over extended time period.....              | 3  |
| Figure S3. Model and properties of the Trap-14-14 design.....                                | 4  |
| Figure S4. Function of Trap 14-14 with different sequence designs and Broccoli aptamer. .... | 5  |
| Figure S5. No effect of key addition on excitation and emission spectra.....                 | 5  |
| Figure S6. Effect of adding toeholds the ends of RNA keys. ....                              | 6  |
| Figure S7. Cryo-EM analysis of Trap-14-14 with no keys. ....                                 | 7  |
| Figure S8. Cross Correlation and Fourier Shell Correlation. ....                             | 8  |
| Figure S9. Cryo-EM analysis of Trap-14-14 upon addition of keys. ....                        | 9  |
| Table S1. RNA blueprints and sequences .....                                                 | 10 |
| Table S2. PCR primers and RNA keys. ....                                                     | 14 |
| References .....                                                                             | 15 |

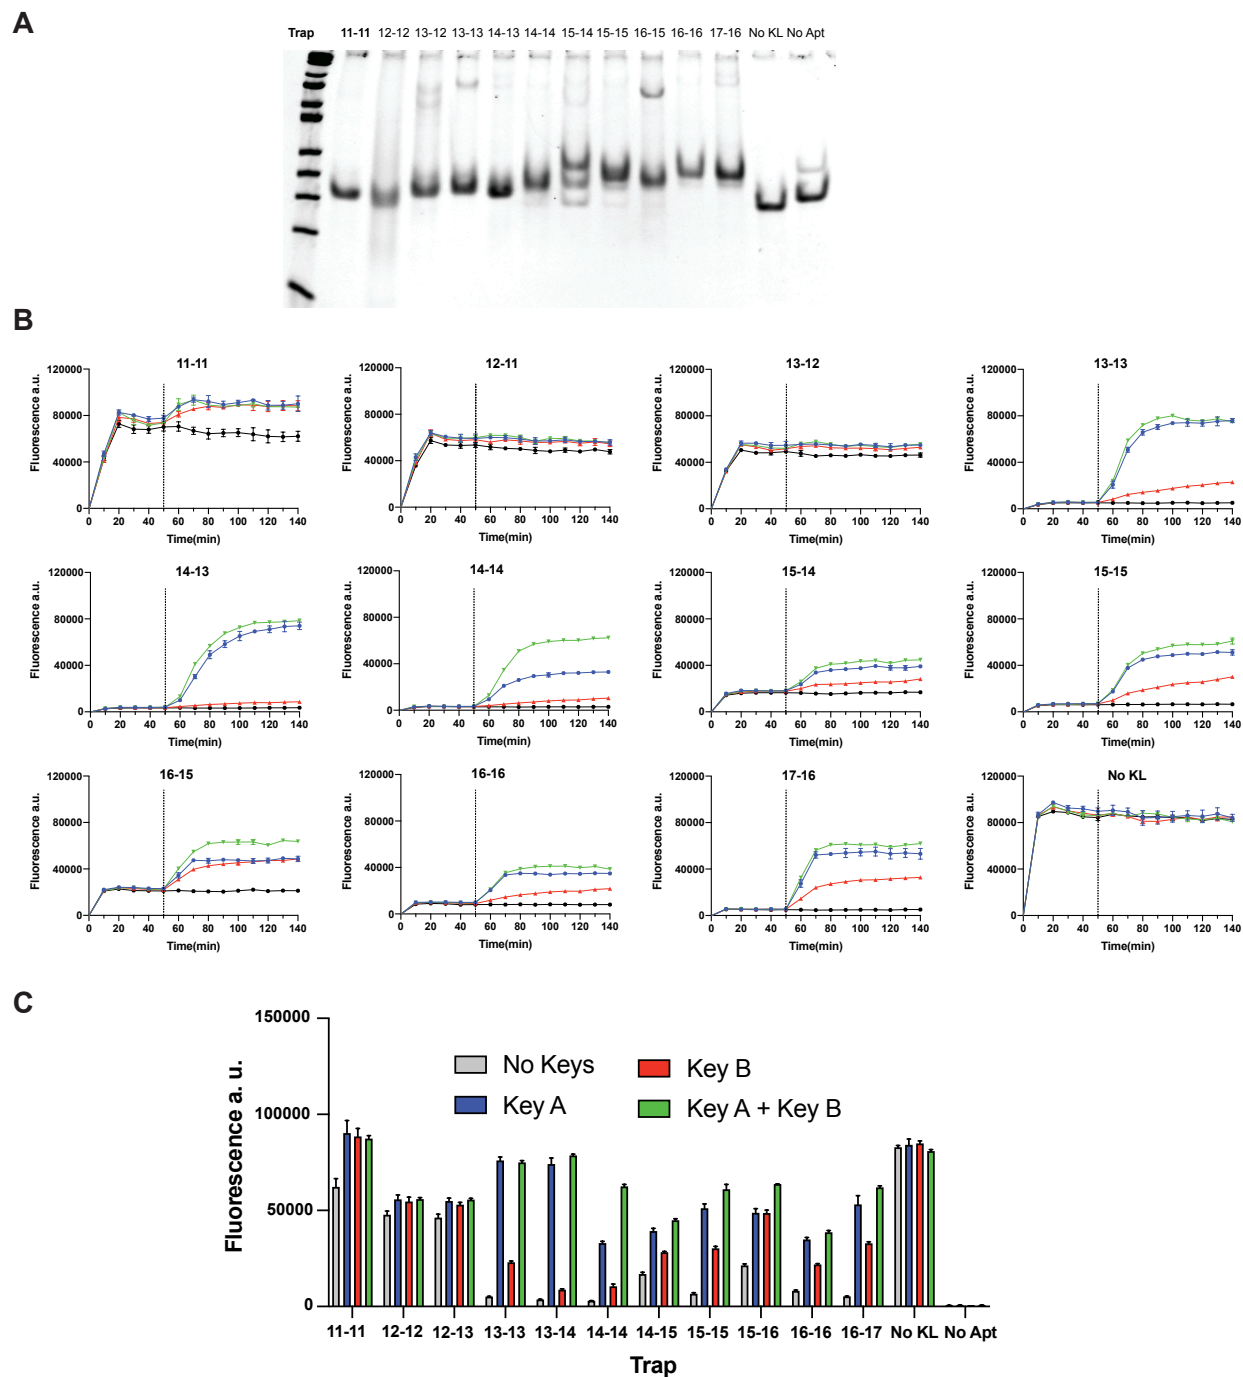

**Figure S1. Design screening for a co-transcriptionally folded RNA mechanical trap.**

**A.** 8% Native PAGE gel showing the state of the different designs after SEC purification. **B.** Design screening. Monitored fluorescence over time of the different designs. The different RNAs were produced and purified to a final concentration of 100 nM. The fluorophore DFHBI-1T (1  $\mu$ M) was added after the first measurement and 5X (500 nM) single stranded RNA keys were added after 50 minutes (black dashed line). Data corresponds to 3 technical replicates, error bars represent mean  $\pm$  SD. **C.** Fluorescence observed at 140 mins (85 minutes upon addition of the RNA keys) for the different designs.

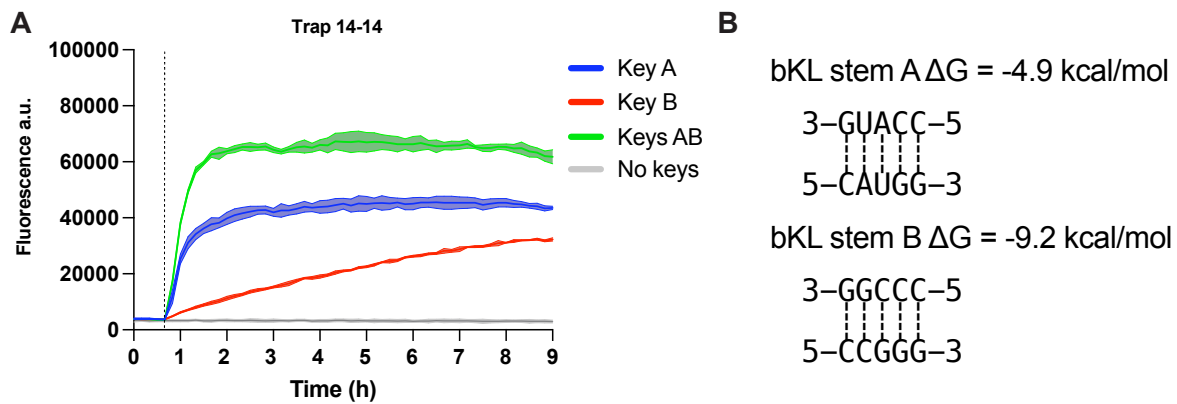

**Figure S2. Opening of Trap-14-14 and stabilities over extended time period.**

**A.** Monitored fluorescence over 9 hours of trap 14-14 (100 nM) in solution with DFHBI-1T (500 nM) after addition of RNA keys (500 nM) at RT (dashed line indicates key addition). Data represents 3 technical replicates  $\pm$  SD. **B.** Free energies of the bKL stems calculated with Nupack.

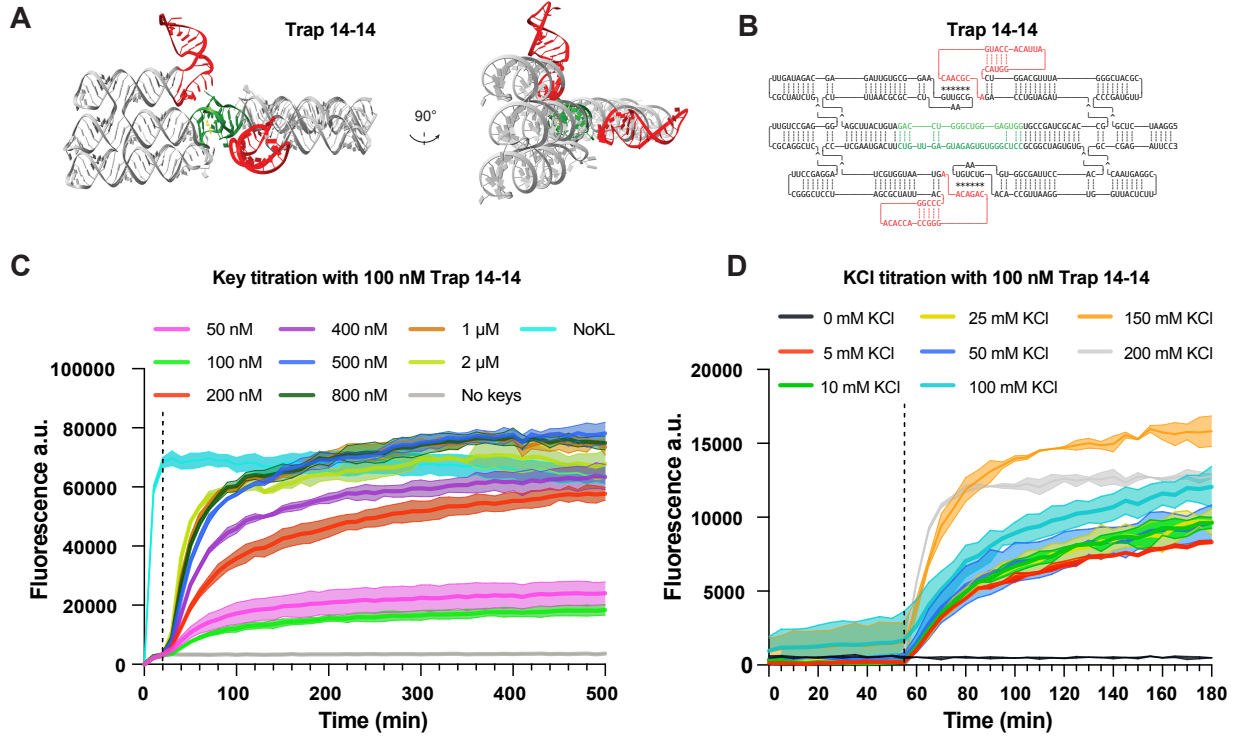

**Figure S3. Model and properties of the Trap-14-14 design.**

**A.** Computer-generated 3D model with RNAbuild [1]. The iSpinach aptamer is depicted in green, bKLs in red and DFHBI-1T ligand in yellow. **B.** RNA sequence text blueprint. The iSpinach motif is highlighted in green and the bKLs in red. **C.** ssRNA key titration. Monitored fluorescence over time of Trap-14-14 RNA (100 nM) in complex with DFHBI-1T (1  $\mu$ M), different concentrations of ssRNAs were added after the first fluorescence measurement. The No kissing loops (NoKL) positive control is shown in cyan blue. Data corresponds to 3 technical replicates, error bars represent mean  $\pm$  SD. **D.** KCl titration. Monitored fluorescence over time of Trap-14-14 (100 nM) in buffers with different KCl concentrations. Data corresponds to 3 technical replicates, error bars represent mean  $\pm$  SD.

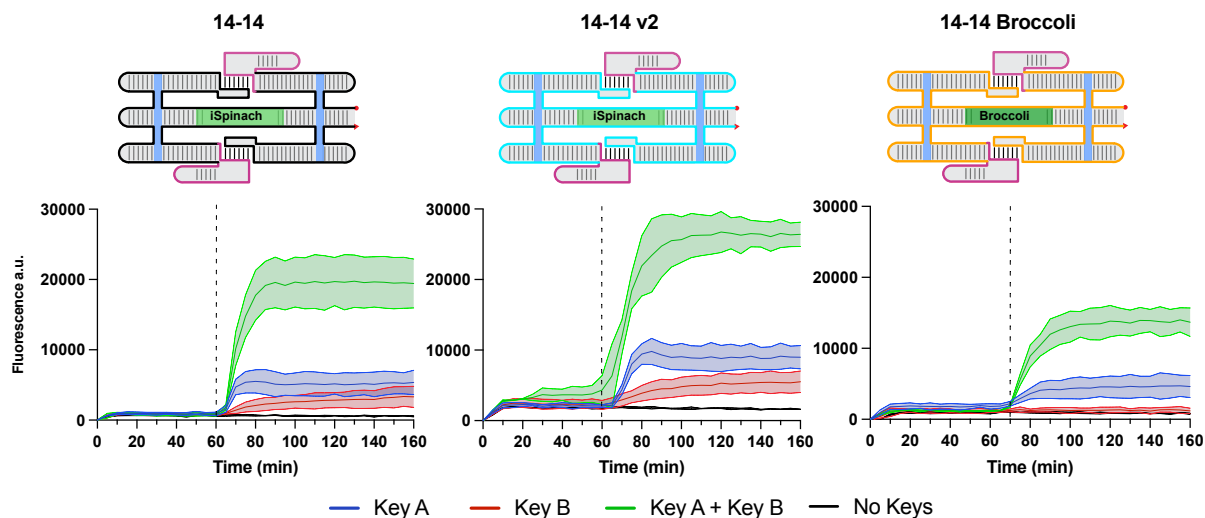

**Figure S4. Function of Trap 14-14 with different sequence designs and Broccoli aptamer.**

Observed fluorescence for the 14-14 design variants over time. 14-14 v2 has a different scaffold sequence (blue line). 14-14 Broccoli has the Broccoli aptamer and a different scaffold sequence (orange line). DFHBI-1T (500 nM) keys (500 nM) were added to 100 nM RNA after 60 minutes (dashed line). Data corresponds to 3 technical replicates; error bars represent mean  $\pm$  SD.

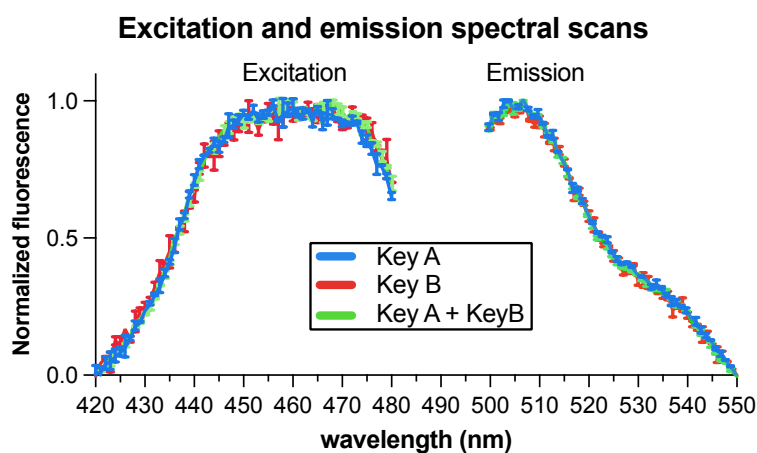

**Figure S5. No effect of key addition on excitation and emission spectra.**

Excitation and emission spectra of DFHBI-1T (500 nM) in complex with the Trap 14-14 (100 nM) at different key conditions (500 nM).

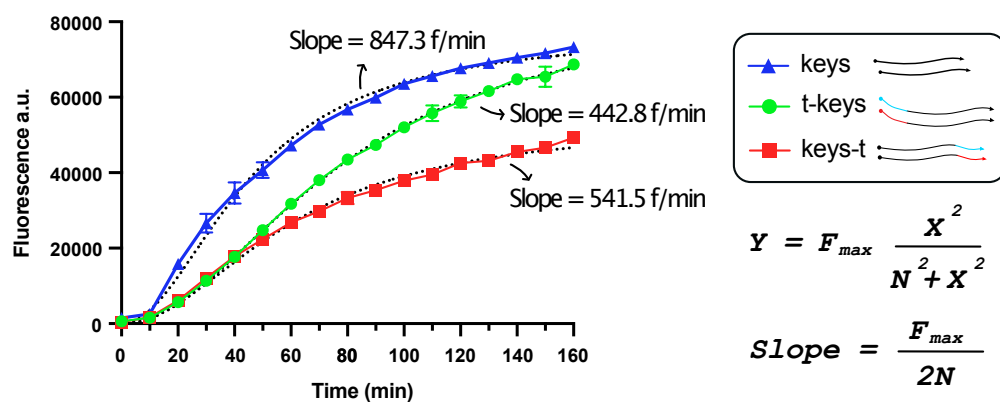

**Figure S6. Effect of adding toeholds the ends of RNA keys.**

Fluorescence activation of 100 nM Trap 14-14 after addition of keys (500 nM) with no toehold or toehold placed at 5'- (t-keys) or 3'- (keys-t) ends (500 nM). Data represents 3 technical replicates  $\pm$  SD.  $F_{max}$  represents the maximum fluorescence and  $N$  represents the inflection point, i.e., time point (x) at which fluorescence has its maximum increase. Model fit  $R^2 = 0.993$  for keys,  $R^2 = 0.998$  for t-keys and  $R^2 = 0.993$  for keys-t.

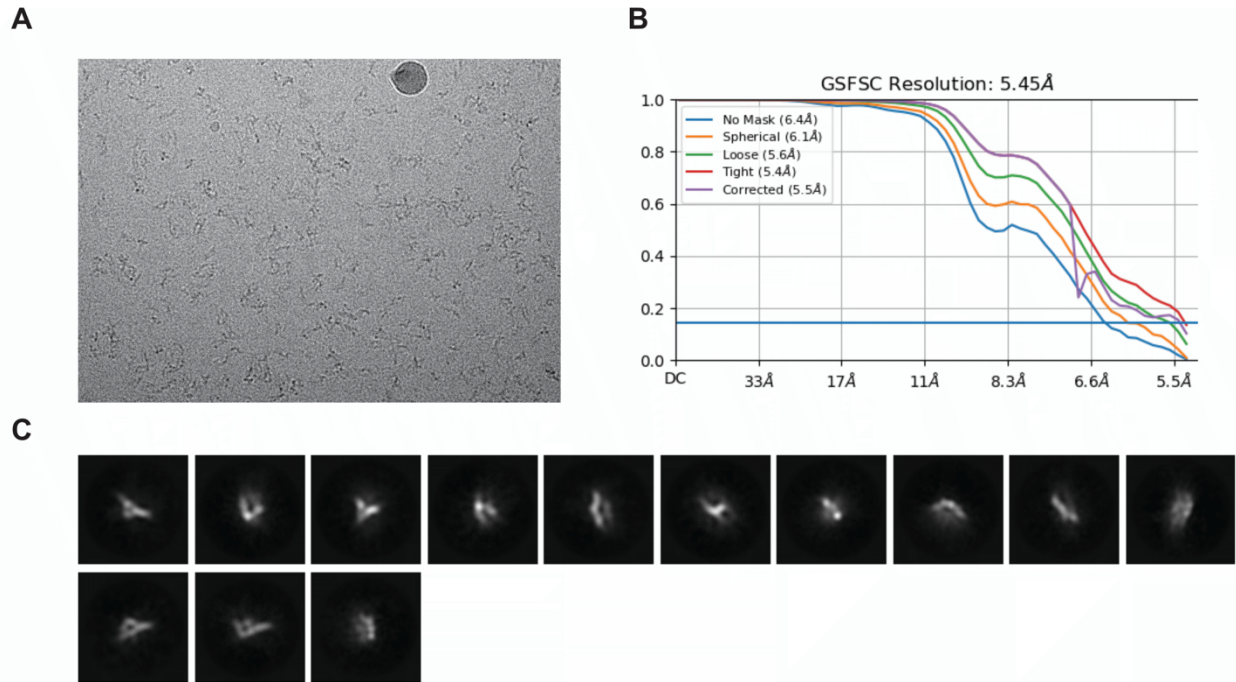

**Figure S7. Cryo-EM analysis of Trap-14-14 with no keys.**

**A.** Example cryo-EM micrograph from the locked Trap-14-14 dataset. **B.** Gold-standard Fourier Shell Correlation for the locked state of Trap-14-14. **C.** 2D Class. Averages from the final particle stack of the locked Trap-14-14 dataset.

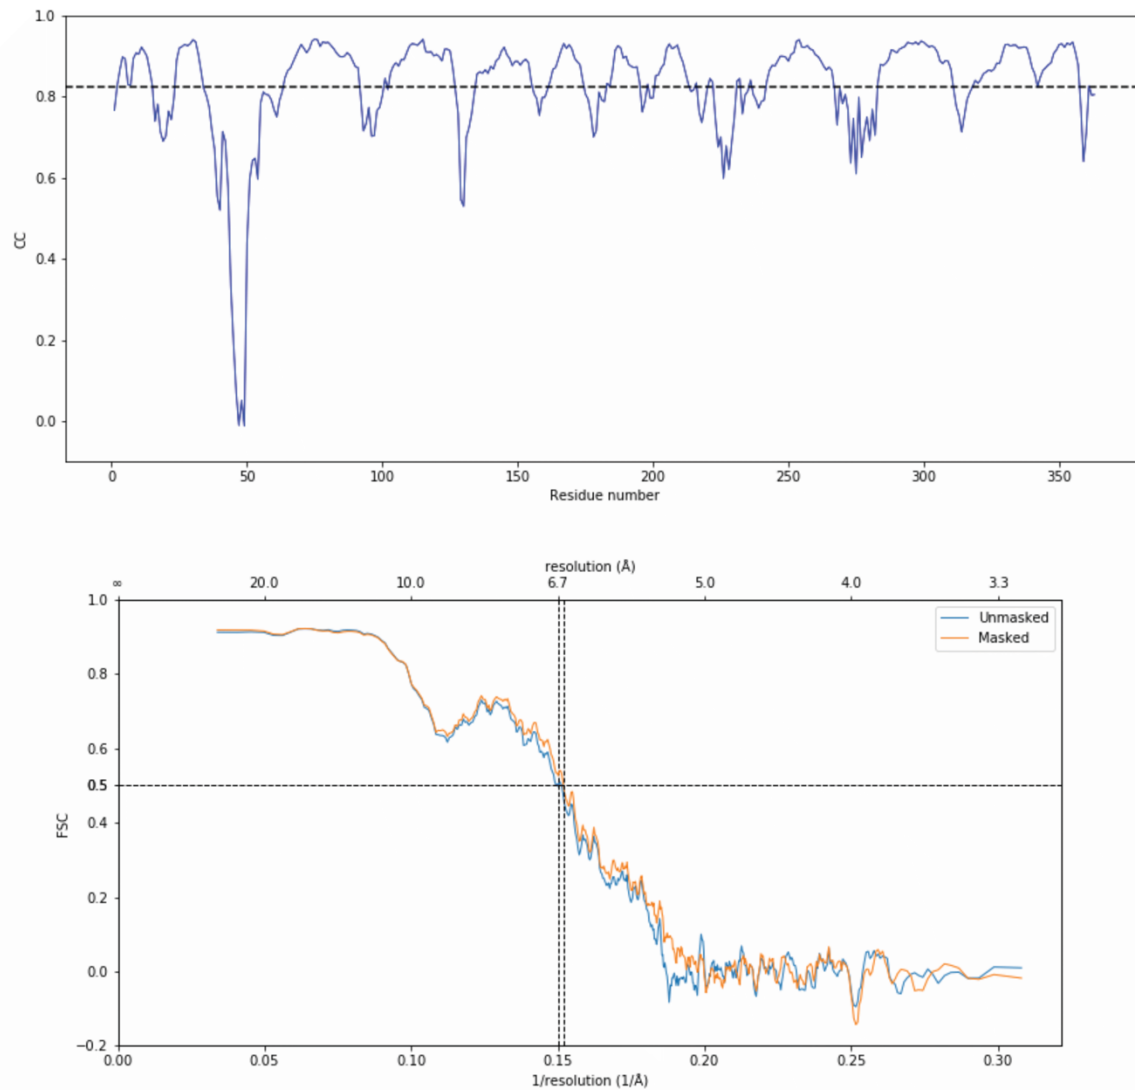

**Figure S8. Cross Correlation and Fourier Shell Correlation.**

Per residue Cross Correlation (top) and Fourier Shell Correlation (bottom) between atomic model and cryo-EM map for the trap 14-14 with no keys after phenix RSR.



**A**

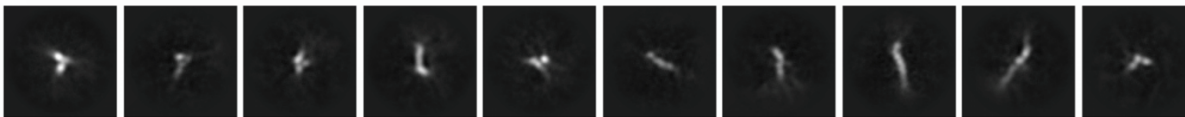

**B**

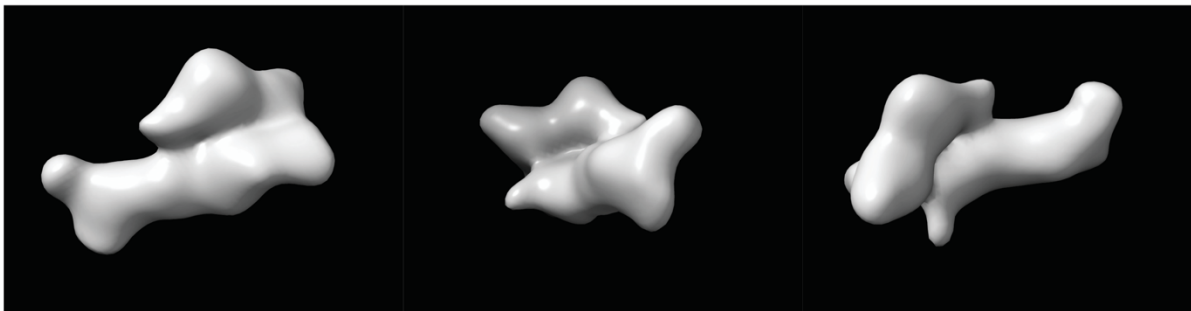

**C**

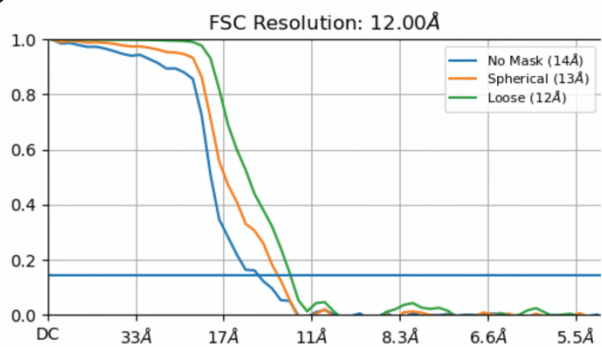

**Figure S9. Cryo-EM analysis of Trap-14-14 upon addition of keys.**

**A.** 2D Class averages from the. Final particle stack of the open Trap-14-14. dataset. **B.** Three views of the Trap-14-14 device with keys reconstruction. **C.** Gold-Standard Fourier Shell Correlation for the open state of Trap-14-14.

**Table S1. RNA blueprints and sequences**

| No Kissing loops control (NoKL) |                                                                                                                                                                                                                                                                                                                                                                   |
|---------------------------------|-------------------------------------------------------------------------------------------------------------------------------------------------------------------------------------------------------------------------------------------------------------------------------------------------------------------------------------------------------------------|
|                                 | <p>=</p> <p>GGAAUCUCGUAACUAGUUCGCUAGUUGCCGGCAUAGGUUUCGAUCUAUGCCGGGACGGGUCGCGGUGAGGGUCGGGUCCAGAUGUCCUCGAAGUAGUAU<br/>                 UUCGUUUCGUCUUCGGGUCAGUCGUUCGCGACUGAGGCGUCCGGUUCGCGGACGGUCGACCUUCGCGGUCGACGUUCUGUUUAUUCGUAAGCGAGAACCC<br/>                 GGAAUCUCUGUUGAGUAGAGUGGGUCCGUGACCCUCGUGCAGCUAUACUUCGGUAUAGUUGCAUGGUUACUCUUCGGAGUAACGCCGAGAUUCC</p> |

| No Aptamer control (NoApt) |                                                                                                                                                                                                                                                                                                                                                                                                                              |
|----------------------------|------------------------------------------------------------------------------------------------------------------------------------------------------------------------------------------------------------------------------------------------------------------------------------------------------------------------------------------------------------------------------------------------------------------------------|
|                            | <p>GGAAUCUCGCCCCGUGUUUCGACACGGGACAGGAGCGCUAUGGAUUACCAUGCAACGCAAGUGCUCUUGUGCAACUGUAGAGCGAAAAGAAAAGCACAG<br/>                 GGAACGGUAGGAGUGGAGAAGCGUUGACUCUGCUCCUACCUAGACGGUUCGCCGUCUACGACAGAAGUUCGUUCUGUGGCAGGCUCUGCCUGCCUUU<br/>                 CAGGAUUCGCCGACACCACCGGGCAGACAAAAGUUUUGGGAGCGGUUCACUGUAAGCGUUAAGAUACACACUCUGCAGUUUGAAUUUACCCGAAAUGUCU<br/>                 GAUCGGGUGAAUUAGUUACUCUUCGGAGUAACGCCGAGAUUCC</p> |

| Trap-11-11 |                                                                                                                                                                                                                                                                                                                                                                                                                             |
|------------|-----------------------------------------------------------------------------------------------------------------------------------------------------------------------------------------------------------------------------------------------------------------------------------------------------------------------------------------------------------------------------------------------------------------------------|
|            | <p>GGAAUCUCGCUCCAGCUUCGGCUGGAGGGAGAGACAGCCAUGGAUUACCAUGCAACGCAGUUGUCUUUCGCUUCGGUCGUGUAGGGUCGGGUCCAG<br/>                 AUGCCUCUCAGACGGAGUCCAAGCGUUGAGGACUCUGUCUGAGCAGUUGUUCGCAACUCGCGCCGUCUUUCGAGGACGGGUCUGGCUUCGGCCAGACUG<br/>                 GGACUAAUUCGCCGACACCACCGGGCAGACAAAUUGGUUCCACCGAGGGUUCUGUUGAGUAGAGUGGGUCUACGUAUGAAUAGCGGUAAGUCAAU<br/>                 GUCUGAGGCUUUAUUCGUUAGUUAUCUUCGGAGUAACGCCGAGAUUCC</p> |

### Trap-12-12

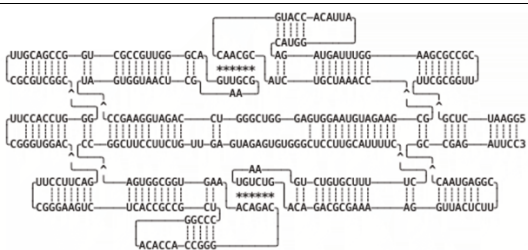

GGAAUUCUGUUCGCGGUUCGCCGCGAAGGUUAGUAGACAUGGAUACACCAUGCAACGCAUCUGCUAAACCGCGAAGUUAAGGUGAGGGUCGGGUCCA  
 GAUGGAAGCCUAGUGGUAAACUCGAAGCGUUGACGGGUUGCCGUGGCCAGCUUUCGCGUCGGCGGGUCCACCUUCGGGUGACGACUUCUUCGGGAAGUC  
 UCACCCGCGUCCCGGACACCAACCGGGCAGACAAGUGGCGGUGACCCGGCUUCUUCUUGUAGUAGAGUGGGGCCUUCUGCAUUUUCUUUCGUGUCU  
 GAAUGUCUGACAGACGCGAAAAGGUUACUCUUCGGAGUAACGCCGAGAUUCC

### Trap-13-12

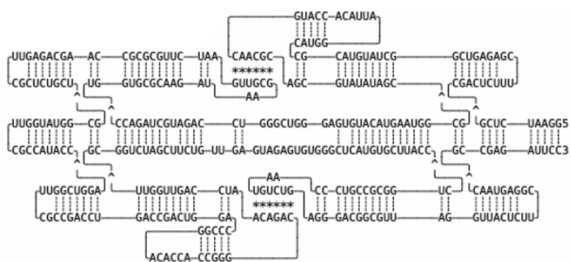

GGAAUUCUGCGACUCUUUCGAGAGUCGGCUAUGUACGCCAUGGAUACACCAUGCAACGCAAGCUAUAAGCGCGGUAAGUACAUGGAGGGUCGGGUCCA  
 GAUGCUAGACCUGGUGCGCAAGAUAAAGCGUUGAAUCUUCGCGCCAAAGCAGAGUUCGCUUCGCGGUUAGGUUUCGCAUACCAGGUCGGUUCGCCGACC  
 UGACCGACUGGACCCGGACACCAACCGGGCAGACAUCCAGUUGGUUUCGGUUCUAGCUUCUUGUAGUAGAGUGGGCCUAGUGUCUACCUCUGCGCGCU  
 CCCAUGUCUGAGGGACGGCGUAGGUUACUCUUCGGAGUAACGCCGAGAUUCC

### Trap-13-13

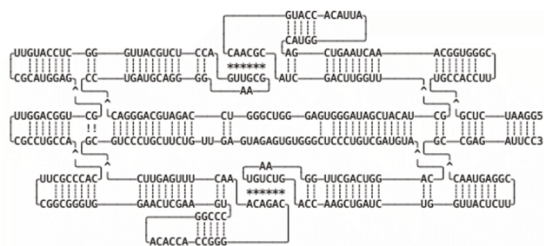

GGAAUUCUGUCCACCUUCGGGUGGCAAAACUAAGUCGACAUGGAUACACCAUGCAACGCAUCGACUUGGUUGCUACAUCGAUAGGGUGAGGGUCGGGUCC  
 AGAUGCAGGGACCCUGAUGCAGGGGAAGCGUUGACCUCUGCAUUGGGUCUCCAGUUCGCAUGGAGGCGUGCAGGUUCGCCUGCCACACCCGCUUCGGCGGG  
 UGGAAUCUGAAGUCCCGGACACCAACCGGGCAGACAACUUUGAGUUCGCGUUCUUCUUGUAGUAGAGUGGGGCCUUCUGCAUUAACAGGUCAG  
 CUUGGAUUGUCGACCAAGCUGAUCUGGUUACUCUUCGGAGUAACGCCGAGAUUCC

### Trap-14-13

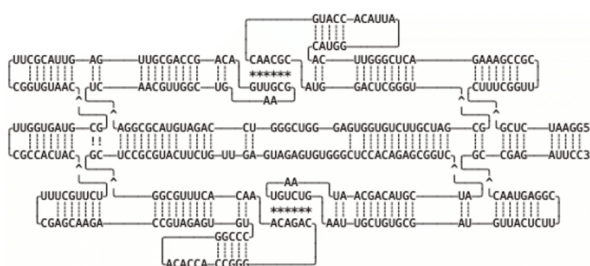

GGAAUCUCGCUUUUCGGUUCGCCGAAAGACUCGGGUUCACAUGGAUACACCAUGCAACGC AUGGACUCGGGUGCGAUCGUUCUGUGGUGAGGGUCGGGUCC  
 AGAUGUACGCGGAUCAACGUUGGCGUAGAGCGUUGACAGCCAGCGUUGAGUUAACGCUUCGGUGUAACGCGUAGUGGUUCGCCACUACUCUUGCUUUUCGAGCA  
 AGACCCGUAAGUGUCCCGGACACACCACCGGGCAGACAAACACUUAUUGCGGGUCUCCGCGUACUUCUGUAGUAGAGUGUGGGUCCACAGAGCGGUAUCGUA  
 CAGCAAUAUGUCUGAUUUCUGUGCGAUGUUAUCUCUUCGGAGUAACGCCGAGAUUCC

### Trap-14-14

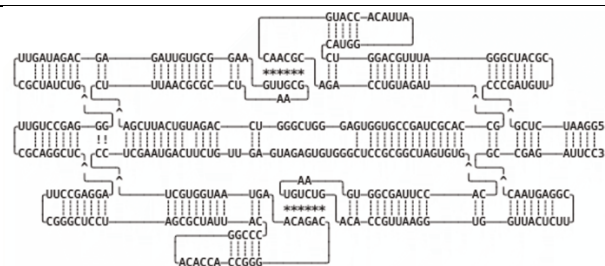

GGAAUCUCGCCCCGAUGUUCGCAUCGGGAUUUGCAGGUCCAUGGAUUAACCAUGCAACGCAGACCUAGUAGUCCACGCUAGCCGUGGUGAGGGUCGGGUC  
 CAGAUGUCAUUCGACUUUAACGCGCUAAGCGUUGAAGCGUUGUAGAGCAGAUAGUUCGCUAUCUGGGGAGCCUGUUCGCGAGGCUCAGGAGCCUUCGGGC  
 UCCUAGCGCUUAUACCCCGGACACACCACCGGGCAGACAAGUAAUGGUGUCUCCUGAAUAGACUUCUGUAGUAGAGUGUGGGUCUCCGCGGCUAGUGUGCACC  
 UUAGCGGUGAAUGUCUGACACCGUUAAGGUGGUUACUCUUCGGAGUAACGCCGAGAUUCC

### Trap-15-14

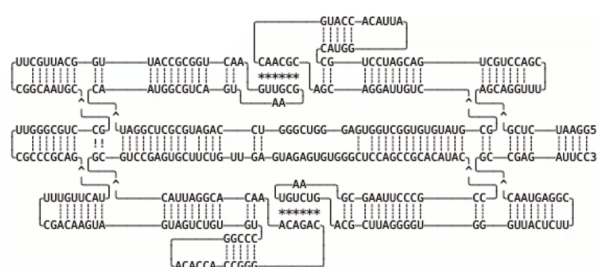

GGAAUCUCGAGCAGGUUUCGACUCUGACGAUCCUGCAUGGAUUAACCAUGCAACGCAGCAGGAUUGUCGCUAUGUGUGGUGGUGAGGGUCGGGUC  
 CAGAUGCGCUCGGAUCAUUGGCGUCAGUAAGCGUUGAACUGGCGCAUUGGCAUUGCUUCGGCAAUGCGCUGCGGGUUCGCCCGCAGUACUUGUUCGAC  
 AAGUAGUAGUCUGUGUCCCGGACACACCACCGGGCAGACAACACGGAUUAACGCGUCCGAGUGUUCUUGUAGUAGAGUGUGGGUCCAGCCGACAUACCC  
 GCCCUAAGCGAAUGUCUGACGCUUAGGGGUGGGUUAUCUCUUCGGAGUAACGCCGAGAUUCC

### Trap-15-15

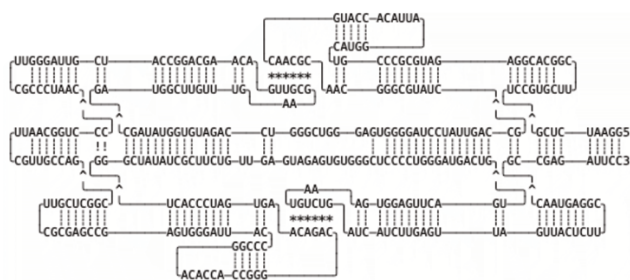

GGAUUCUGUCCGUGCUUCGGCAGGAGAUGCGCCCGUCAUGGAUUAACCAUGCAACGCACGGGCGUAUCCGAGUUAUCCUAGGGGUGAGGGUCGGGU  
 CCAGAUGUGUAUAGCGAUGGCUUGUUUGAAGCGUUGACAAGCAGGCCAUCGUUAGGGUUCGCCCUAACCCUUGGCAUUCGUUGCCAGCGGCUCGUUCGC  
 GAGCCGAGUGGGAUUACCCGGACACCACCGGCAGACAAGUAUCCACUGGGCUUAUUCGCUUCUGUUGAGUAGAGUGGGUCUCCUUGGAUGACUG  
 UGACUUGAGGUGAAUUGUCUGAUCAUCUUGAGUUAUACUCUUCGGAGUAACGCCGAGAUUCC

### Trap-16-15

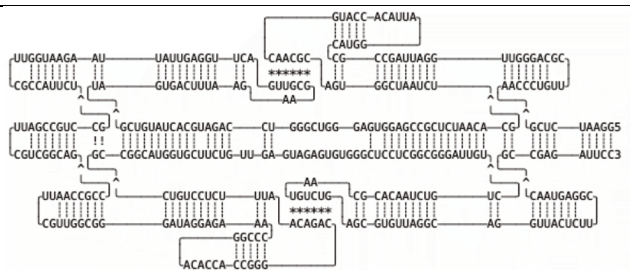

GGAUUCUGAACCUGUUCGCAAGGUUGGAUUAAGCCGCAUGGAUUAACCAUGCAACGCAGUGGCUAUUCUGCACAAUUCGCCGAGGUGAGGGUCGGGU  
 CCAGAUGCACUAUUGCGUAGUGACUUUAAGAAGCGUUGACUUGGAGUUAUUAAGAUGGUUCGCCAUUCUGCCUUGCCGAAUUCGUCGCGCAGCCGCCAAUUCG  
 UUGCGGGGAUAGGAGAAACCCGGACACCACCGGCAGACA AUUUCUCCUGGCCGCAUGGUGCUUCUGUUGAGUAGAGUGGGUCUCCUGCGGGGAU  
 GUCUCUAACACGCAUUGUCUGAGCGGUGUAGGCAGGUUACUCUUCGGAGUAACGCCGAGAUUCC

### Trap-16-16

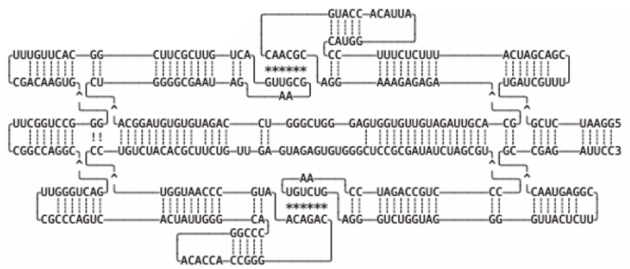

GGAUUCUGGUAUCGUUUCGACGAUCAUUCUCUUCUCCAUUGGAUUAACCAUGCAACGCAGGAAAGAGAGAGCAGUUAAGUUGUUGGUGAGGGUCGGG  
 UCCAGAUGUGUAGGCACUGGGGCGAAUAGAAGCGUUGACUUGUUCGCUUCGGCACUUGUUUCGACAAGUGGGGCCUUCGGCCAGGCAGUCGGGUUC  
 GCCAGUCACUAUUGGGCACCGGACACCACCGGCAGACA AUGCCAAUGCCUUGUCUACACGCUUCUGUUGAGUAGAGUGGGUCUCCGCGAUUAUCUA  
 GCGUCCUCCAGAUCCA AUGUCUGAGGGUCUGGUAAGGGUUAUCUCUUCGGAGUAACGCCGAGAUUCC

### Trap-17-16

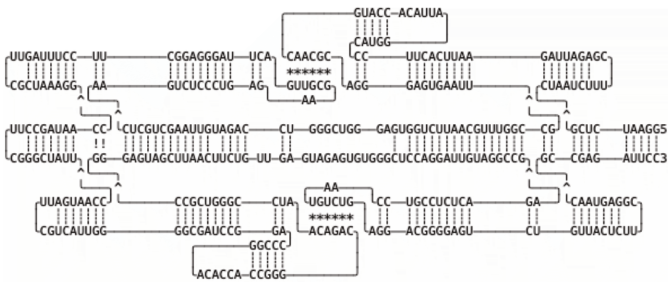

GGAAUCUCGCUAAUCUUUCGAGAUUAGAAUUCACUUCUCCAUUGAUUACACCAUGCAACGCAGGGAGUGAAUUGCCGGUUUGCAAUUCUGUGAGGGUCGGG  
 UCCAGAUUUUAGCUGCUCAGUCUCCUGAGAAGCGUUGACUUAGGGAGGCUUCCUUUAGUUCGCUAAAGGCCAAUAGCCUUCGGGCUAUUCCAUGAUU  
 CGUCAUUGGGGCGAUCGGACCCGGACACCACCGGGCAGACAUCGGGUCGCGGGGAGUAGCUUAACUUCUGUUGAGUAGAGUGGGUCUCCAGGAUUU  
 AGGCCGAGACUCUCCGUCCAUGUCUGAGGACGGGGAGUCUGUUACUCUUCGGAGUAACGCCGAGAUUCC

### Trap-14-14 v2

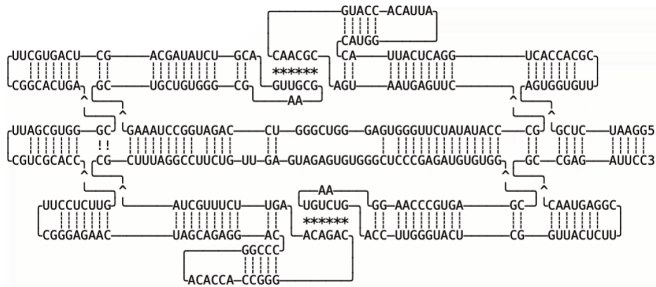

GGAAUCUCGAGUGGUGUUCGACCACUGGACUCAUACCAUGGAUACACCAUGCAACGCAGUAAUAGAGUUCGCCAUUAUUCUUGGGUGAGGGUCGGGUC  
 CAGAUGGCCUAAAGGCGUCUGUGGGCGAAGCGUUGACGUCUAUAGCAGUCUUCGGCAGACGGGUGCGAUUCGUCGACCCGUUCUCCUCCGGGA  
 GAACUAGCAGAGGACCCCGGACACCACCGGGCAGACAAGUUCUUUGCUACGCUUUAGGCCUUCUGUUGAGUAGAGUGGGUCUCCGAGAUUGUGGGCAG  
 UGCCAAGGAUUGUCUGACCUUGGGUACUCGDUUACUCUUCGGAGUAACGCCGAGAUUCC

### Trap-14-14 Broccoli

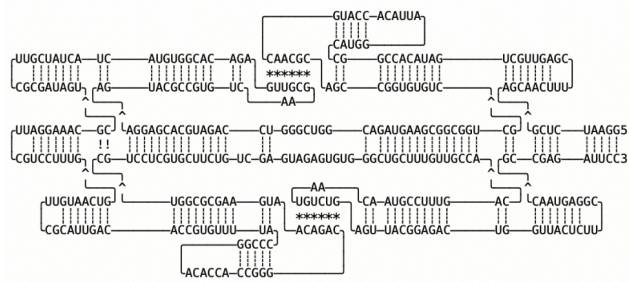

GGAAUCUCGAGCAACUUCGAGUUGCUGAUACACCGGCCAUGGAUACACCAUGCAACGCAGCCGGUGUGUCGUGGGCGGCAAGUAGACGGUCGGGUCCA  
 GAUGCACGAGGAAGUACGCCUGUCAAGCGUUGAGACACGGUGUACUACUACUUCGUGCGAUAUGUCGCAAGGAUUCGUCUUUUGGCUAAUGUUCGCAUUG  
 ACACCGUUUUUACCCGGACACCACCGGGCAGACAAGUAGCGCGGUCGUCUCCUGUCGAGUAGAGUGGGUCGUUUUUGGCCACAGUUUCC  
 GUAAACAUGUCUGAGUUCAGGAGACUGGUUACUCUUCGGAGUAACGCCGAGAUUCC

Table S2. PCR primers and RNA keys.

### PCR Primers (5' to 3')

|                          |
|--------------------------|
| Forward                  |
| CAGACTTCTTACGTGATCCATCCG |
| Reverse                  |
| GGAATCTCGGCGTTACTCCG     |

### RNA keys (5' to 3')

|                            |
|----------------------------|
| Key A                      |
| GCGUUGCAUGGUGUAAU          |
| Key B                      |
| UGUCUGCCCGGUGGUGU          |
| Key C                      |
| AACCUAACUCAAUUCUCU         |
| Key D                      |
| UAACAAAACAGACAAAG          |
| Key A with 3' toehold      |
| GCGUUGCAUGGUGUAAU-ACGUCC   |
| Key B with 3' toehold      |
| UGUCUGCCCGGUGGUGU-UGAAGC   |
| Anti-key t-A*              |
| CGACGUAUUACACCAUGCAACGC    |
| Anti-key t-B*              |
| GCUUCAACACCACCGGGCAGACA    |
| Key A with 5' toehold      |
| GUCCAC-GCGUUGCAUGGUGUAAU   |
| Key B with 5' toehold      |
| CGAAGU-UGUCUGCCCGGUGGUGU   |
| Negative control invader E |
| CUGCACAGAACGGGAUUCUUUCA    |
| Negative control invader F |
| GGGAAGGUGUUUGCUGGGAGUGA    |

### References

1. Geary, C., et al., *RNA origami design tools enable cotranscriptional folding of kilobase-sized nanoscaffolds*. *Nature Chemistry*, 2021. **13**(6): p. 549-558.
